# Supplementary material for: Potential Phosphorylation of Viral Nonstructural Protein 1 in Dengue Virus Infection
Source: MDPI journal article supplement (doi:10.3390/v13071393), 2021-07-17
Supplement: s1 [file s1]

**Table S1. Oligonucleotide primer sequences used for site-directed mutagenesis of DENV NS1 by alanine substitution at specific amino acid positions**

| <b>DENV NS1 mutation</b> | <b>Oligonucleotide primer sequences</b>                          |
|--------------------------|------------------------------------------------------------------|
| T27A                     | Forward: 5'-AACGTGCAC <u>GC</u> ATGGACAGAACAATACAAG-3'           |
|                          | Reverse: 5'-TGTCCAT <u>TG</u> CGTGCACGTTGTCTGTGATGTT-3'          |
| T29A                     | Forward: 5'-CACACATGGG <u>C</u> AGAACAATACAAGTTCCAA-3'           |
|                          | Reverse: 5'-TTGTTCT <u>TG</u> CCCATGTGTGCACGTTGTC-3'             |
| Y32A                     | Forward: 5'-GCACACATGGACAGAACAAG <u>CC</u> AAGTTCCAACCAGAATCC-3' |
|                          | Reverse: 5'-GGATTCTGGTTGGAACCTT <u>GG</u> CTTGTCTGTCCATGTGTGC-3' |
| T230A                    | Forward: 5'-AAATCACACG <u>CC</u> CTCTGGAGCAATGGAGTG-3'           |
|                          | Reverse: 5'-CCAGAGG <u>GC</u> GTGTGATTTTGGCCAGTGGCA-3'           |
| S233A                    | Forward: 5'-AAAATCACACACCCTCTGGG <u>CC</u> AATGGAGTGCTAGAAAGT-3' |
|                          | Reverse: 5'-ACTTTCTAGCACTCCATT <u>GG</u> CCCAGAGGGTGTGTGATTTT-3' |
| V6A                      | Forward: 5'- GGTTGCGTT <u>GCG</u> AGCTGGAAAAACAAAGAA-3'          |
|                          | Reverse: 5'-CCAGCTC <u>GCA</u> ACGCAACCACTATCGGCCTG-3'           |
