# Supplementary material for: Potential Phosphorylation of Viral Nonstructural Protein 1 in Dengue Virus Infection
Source: MDPI journal article supplement (doi:10.3390/v13071393), 2021-07-17
Supplement: s1 [file s1]

**Table S3. Frequency of detection of potential phosphorylation sites at specific amino acid positions of the extracellular NS1 protein**

| Source     |            | Extracellular NS1 |     |     |     |      |     |     |     |      |     |     |     | Overall frequency<br>of detection of<br>phosphopeptides |
|------------|------------|-------------------|-----|-----|-----|------|-----|-----|-----|------|-----|-----|-----|---------------------------------------------------------|
| Cell type  |            | HepG2             |     |     | Sum | Huh7 |     |     | Sum | Vero |     |     | Sum |                                                         |
| Sample set |            | 1                 |     |     |     | 1    |     |     |     | 1    |     |     |     |                                                         |
| Position   | Amino acid | 2.1               | 2.2 | 2.3 |     | 3.1  | 3.2 | 3.3 |     | 1.1  | 1.2 | 1.3 |     |                                                         |
|            |            |                   |     |     |     |      |     |     |     |      |     |     |     |                                                         |
| 17         | S          | -                 | -   | 1   | 1   | -    | -   | -   | 0   | -    | -   | -   | 0   | 1                                                       |
| 22         | T          | -                 | -   | 1   | 1   | -    | 1   | -   | 1   | 1    | -   | -   | 1   | 3                                                       |
| 27         | T          | 1                 | 1   | -   | 2   | 2    | 1   | -   | 3   | 1    | 3   | 1   | 5   | 10                                                      |
| 29         | T          | 1                 | 1   | -   | 2   | 1    | -   | -   | 1   | -    | 1   | 2   | 3   | 6                                                       |
| 32         | Y          | -                 | -   | -   | 0   | 1    | 2   | -   | 3   | 2    | 2   | 1   | 5   | 8                                                       |
| 59         | S          | -                 | -   | 1   | 1   | -    | -   | -   | 0   | -    | -   | -   | 0   | 1                                                       |
| 61         | T          | -                 | -   | -   | 0   | -    | -   | -   | 0   | -    | -   | -   | 0   | 0                                                       |
| 72         | T          | -                 | -   | -   | 0   | -    | -   | -   | 0   | -    | -   | -   | 0   | 0                                                       |
| 80         | S          | -                 | -   | -   | 0   | -    | -   | -   | 0   | -    | -   | -   | 0   | 0                                                       |
| 87         | T          | -                 | -   | 1   | 1   | 1    | 1   | -   | 2   | -    | -   | -   | 0   | 3                                                       |
| 90         | T          | -                 | -   | 1   | 1   | -    | -   | -   | 0   | -    | 1   | -   | 1   | 2                                                       |
| 103        | S          | -                 | -   | -   | 0   | -    | -   | 1   | 1   | 1    | 1   | -   | 2   | 3                                                       |
| 113        | Y          | -                 | -   | -   | 0   | -    | -   | -   | 0   | -    | -   | -   | 0   | 0                                                       |
| 114        | S          | -                 | -   | -   | 0   | -    | -   | -   | 0   | 1    | -   | -   | 1   | 1                                                       |
| 117        | T          | -                 | -   | -   | 0   | -    | -   | -   | 0   | 1    | -   | -   | 1   | 1                                                       |
| 125        | S          | -                 | 1   | -   | 1   | -    | -   | -   | 0   | -    | -   | -   | 0   | 1                                                       |
| 126        | T          | -                 | 1   | -   | 1   | -    | -   | -   | 0   | -    | -   | -   | 0   | 1                                                       |
| 128        | S          | -                 | 1   | -   | 1   | -    | -   | -   | 0   | -    | -   | -   | 0   | 1                                                       |
| 132        | T          | -                 | 1   | -   | 1   | -    | -   | -   | 0   | -    | -   | -   | 0   | 1                                                       |
| 181        | S          | -                 | -   | -   | 0   | -    | -   | -   | 0   | -    | 1   | -   | 1   | 1                                                       |
| 185        | S          | -                 | -   | -   | 0   | -    | -   | -   | 0   | -    | -   | -   | 0   | 0                                                       |
| 200        | Y          | -                 | -   | -   | 0   | -    | -   | -   | 0   | -    | -   | -   | 0   | 0                                                       |
| 204        | S          | -                 | -   | -   | 0   | -    | -   | -   | 0   | -    | -   | -   | 0   | 0                                                       |
| 216        | S          | -                 | -   | -   | 0   | -    | -   | -   | 0   | -    | -   | -   | 0   | 0                                                       |
| 228        | S          | -                 | -   | -   | 0   | -    | -   | -   | 0   | -    | -   | -   | 0   | 0                                                       |
| 230        | T          | 1                 | 2   | 1   | 4   | 2    | 1   | -   | 3   | 1    | 2   | 1   | 4   | 11                                                      |
| 233        | S          | 1                 | 2   | 2   | 5   | 2    | 1   | -   | 3   | 1    | 2   | 2   | 5   | 13                                                      |
| 239        | S          | -                 | -   | -   | 0   | -    | -   | -   | 0   | -    | 1   | -   | 1   | 1                                                       |
| 252        | S          | -                 | 1   | -   | 1   | -    | -   | -   | 0   | -    | -   | -   | 0   | 1                                                       |
| 256        | Y          | -                 | -   | -   | 0   | -    | -   | -   | 0   | -    | -   | -   | 0   | 0                                                       |
| 262        | T          | -                 | -   | -   | 0   | -    | -   | -   | 0   | -    | -   | -   | 0   | 0                                                       |
| 265        | T          | -                 | -   | -   | 0   | -    | -   | -   | 0   | -    | -   | -   | 0   | 0                                                       |
| 297        | S          | -                 | -   | -   | 0   | -    | -   | -   | 0   | 2    | -   | 1   | 3   | 3                                                       |
| 300        | T          | -                 | -   | -   | 0   | -    | -   | -   | 0   | 2    | -   | 1   | 3   | 3                                                       |
| 301        | T          | 1                 | -   | -   | 1   | -    | -   | -   | 0   | 2    | -   | 1   | 3   | 4                                                       |
| 302        | T          | -                 | -   | -   | 0   | -    | -   | -   | 0   | 1    | -   | 1   | 2   | 2                                                       |
| 304        | S          | 1                 | -   | -   | 1   | -    | -   | -   | 0   | 1    | -   | 1   | 2   | 3                                                       |
| 309        | T          | -                 | -   | -   | 0   | -    | -   | -   | 0   | -    | -   | -   | 0   | 0                                                       |
