# Supplementary material for: Potential Phosphorylation of Viral Nonstructural Protein 1 in Dengue Virus Infection
Source: MDPI journal article supplement (doi:10.3390/v13071393), 2021-07-17
Supplement: s1 [file s1]

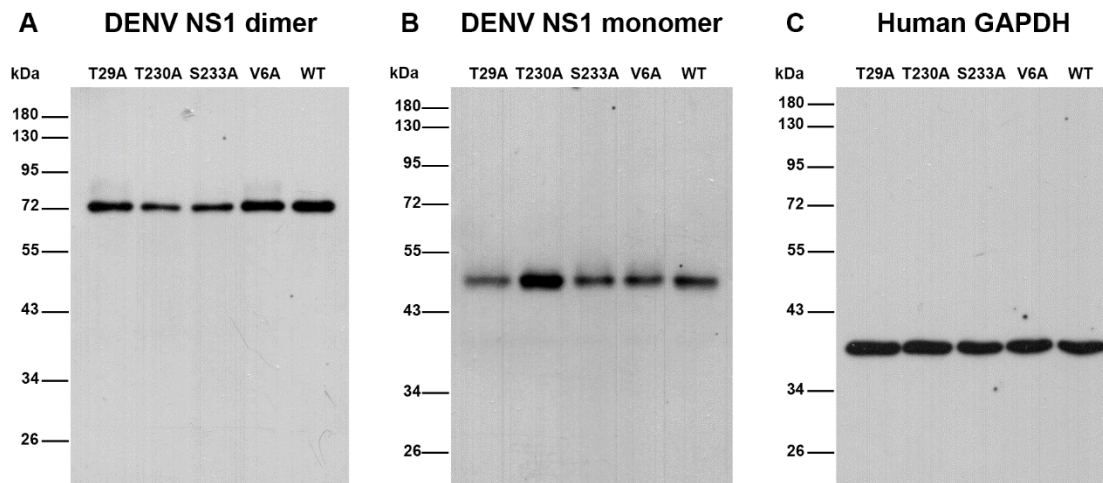

**Figure S3.** Immunoblotting analysis of cell-associated DENV NS1 proteins in wild-type DENV and mutant-infected cell cultures. Cell lysates were harvested from Vero cells infected with wild-type DENV or different virus mutants at day 7 post-infection. The lysate samples were untreated or treated with  $\beta$ -mercaptoethanol at 95 °C for 5 minutes, and then subjected to 10% SDS-PAGE and subsequent immunoblotting using specific antibodies to detect DENV NS1 dimer (A), or DENV NS1 monomer and human GAPDH (internal control) (B and C), respectively. The representative results of three independent experiments with a similar outcome are shown.
