# Supplementary material for: Potential Phosphorylation of Viral Nonstructural Protein 1 in Dengue Virus Infection
Source: MDPI journal article supplement (doi:10.3390/v13071393), 2021-07-17
Supplement: s1 [file s1]

**Table S2. Frequency of detection of potential phosphorylation sites at specific amino acid positions of the cell-associated NS1 protein**

| Source     |            | Intracellular NSI |     |     |     |     |     |     |     |     |     |     |      |     |     |     |     |     |     |     |     |     |     |      |     |     |     | Overall frequency<br>of detection of<br>phosphopeptides |     |     |     |     |   |
|------------|------------|-------------------|-----|-----|-----|-----|-----|-----|-----|-----|-----|-----|------|-----|-----|-----|-----|-----|-----|-----|-----|-----|-----|------|-----|-----|-----|---------------------------------------------------------|-----|-----|-----|-----|---|
| Cell type  |            | HepG2             |     |     |     |     |     |     |     |     |     | Sum | Huh7 |     |     |     |     |     |     |     |     |     | Sum | Vero |     |     |     |                                                         |     |     |     | Sum |   |
| Sample set |            | 1                 |     |     | 2   |     |     | 3   |     |     |     |     | 1    |     |     | 2   |     |     | 3   |     |     |     |     | 1    |     |     | 2   |                                                         |     | 3   |     |     |   |
| Position   | Amino acid | 1.1               | 1.2 | 1.3 | 2.1 | 2.2 | 2.3 | 3.1 | 3.2 | 3.3 | 1.1 |     | 1.2  | 1.3 | 2.1 | 2.2 | 2.3 | 3.1 | 3.2 | 3.3 | 1.1 | 1.2 |     | 1.3  | 2.1 | 2.2 | 2.3 |                                                         | 3.1 | 3.2 | 3.3 |     |   |
| 17         | S          | -                 | -   | -   | -   | -   | -   | -   | -   | -   | 0   |     | -    | -   | -   | -   | -   | -   | -   | -   | 0   | -   |     | -    | -   | -   | -   |                                                         | -   | -   | -   |     | 1 |
| 22         | T          | -                 | -   | 1   | -   | -   | -   | -   | -   | -   | 1   | -   | -    | -   | -   | -   | -   | -   | -   | 0   | -   | -   | -   | -    | -   | -   | -   | -                                                       | 1   | 1   |     |     |   |
| 27         | T          | -                 | -   | 1   | -   | 1   | -   | -   | 1   | -   | 3   | -   | -    | -   | -   | 1   | 1   | -   | -   | 2   | -   | -   | -   | -    | -   | 1   | 1   | -                                                       | 2   | 4   |     |     |   |
| 29         | T          | 2                 | -   | 2   | 1   | -   | -   | -   | 1   | -   | 6   | 1   | -    | 1   | 2   | 1   | -   | -   | -   | 5   | -   | -   | -   | -    | -   | -   | -   | 2                                                       | 2   |     |     |     |   |
| 32         | Y          | 2                 | -   | -   | 1   | 1   | -   | -   | -   | -   | 4   | 1   | -    | 1   | 2   | -   | 1   | -   | -   | 5   | -   | -   | -   | -    | -   | 1   | 1   | -                                                       | -   | 2   |     |     |   |
| 59         | S          | -                 | -   | -   | -   | -   | -   | -   | -   | -   | 0   | -   | -    | -   | -   | -   | -   | -   | -   | 0   | -   | -   | -   | -    | -   | -   | -   | -                                                       | -   | 0   |     |     |   |
| 61         | T          | -                 | -   | -   | -   | -   | -   | -   | -   | -   | 0   | -   | -    | -   | -   | -   | -   | -   | -   | 0   | -   | 1   | -   | -    | -   | -   | -   | -                                                       | -   | 1   |     |     |   |
| 72         | T          | -                 | -   | -   | -   | -   | 1   | -   | -   | -   | 1   | -   | -    | -   | -   | -   | -   | -   | -   | 0   | -   | -   | -   | -    | -   | -   | -   | -                                                       | -   | 0   |     |     |   |
| 80         | S          | -                 | -   | -   | -   | -   | 1   | -   | 1   | -   | 2   | -   | -    | -   | -   | -   | -   | -   | -   | 0   | -   | -   | -   | -    | -   | -   | -   | -                                                       | -   | 0   |     |     |   |
| 87         | T          | -                 | 1   | -   | -   | -   | -   | -   | 1   | -   | 2   | -   | -    | -   | -   | -   | -   | -   | -   | 0   | -   | -   | -   | -    | -   | 1   | -   | -                                                       | -   | 1   |     |     |   |
| 90         | T          | -                 | 1   | -   | -   | -   | -   | -   | 1   | 1   | 3   | -   | -    | -   | -   | -   | 1   | -   | -   | 1   | -   | -   | -   | -    | 1   | -   | -   | -                                                       | -   | 1   |     |     |   |
| 103        | S          | -                 | -   | -   | -   | 1   | -   | -   | 1   | -   | 2   | -   | -    | -   | -   | -   | 1   | -   | -   | 1   | -   | -   | -   | -    | -   | -   | -   | -                                                       | 0   | 3   |     |     |   |
| 113        | Y          | -                 | 1   | -   | -   | -   | -   | -   | -   | 1   | 2   | -   | -    | -   | -   | -   | -   | -   | -   | 0   | -   | -   | -   | -    | -   | -   | 1   | 1                                                       | 2   | 4   |     |     |   |
| 114        | S          | -                 | 1   | -   | -   | -   | -   | -   | -   | -   | 1   | -   | -    | -   | -   | -   | -   | -   | -   | 0   | -   | -   | -   | -    | -   | -   | 1   | 1                                                       | 2   | 3   |     |     |   |
| 117        | T          | -                 | 1   | -   | -   | -   | 2   | -   | -   | -   | 3   | -   | -    | -   | -   | -   | -   | -   | -   | 0   | -   | -   | -   | -    | -   | 1   | 1   | 1                                                       | 3   | 6   |     |     |   |
| 125        | S          | -                 | 1   | -   | -   | -   | 2   | -   | -   | -   | 3   | -   | -    | 1   | 1   | -   | -   | -   | -   | 2   | -   | -   | -   | -    | -   | 1   | 1   | 1                                                       | 3   | 8   |     |     |   |
| 126        | T          | -                 | 1   | 1   | 1   | 1   | 2   | -   | 1   | -   | 7   | -   | -    | 1   | 2   | -   | 1   | -   | -   | 4   | -   | -   | -   | -    | -   | 1   | -   | 1                                                       | 2   | 13  |     |     |   |
| 128        | S          | -                 | 1   | 1   | 1   | 1   | 1   | -   | 1   | 1   | 7   | -   | -    | -   | 2   | -   | 1   | -   | -   | 3   | -   | -   | -   | -    | -   | 1   | -   | 1                                                       | 2   | 12  |     |     |   |
| 132        | T          | -                 | -   | 1   | 1   | 1   | 1   | -   | 1   | 1   | 6   | -   | -    | -   | 2   | -   | 1   | -   | -   | 3   | -   | -   | -   | 1    | -   | -   | -   | 1                                                       | 2   | 11  |     |     |   |
| 181        | S          | -                 | -   | -   | -   | -   | -   | -   | -   | -   | 0   | -   | -    | -   | -   | 1   | -   | -   | 1   | 2   | -   | -   | -   | -    | -   | -   | 1   | 1                                                       | 3   | 3   |     |     |   |
| 185        | S          | -                 | -   | -   | -   | -   | -   | -   | -   | -   | 0   | -   | -    | -   | 1   | -   | 1   | -   | 1   | 3   | -   | -   | -   | -    | -   | -   | -   | -                                                       | 0   | 3   |     |     |   |
| 200        | Y          | -                 | -   | -   | -   | -   | -   | -   | -   | -   | 0   | -   | -    | -   | -   | -   | -   | -   | -   | 0   | -   | -   | -   | -    | 1   | -   | -   | -                                                       | -   | 1   |     |     |   |
| 204        | S          | -                 | -   | -   | -   | -   | -   | -   | -   | -   | 0   | -   | -    | -   | -   | -   | -   | -   | -   | 0   | -   | -   | -   | -    | 1   | -   | -   | -                                                       | -   | 1   |     |     |   |
| 216        | S          | -                 | -   | -   | -   | -   | -   | -   | 1   | -   | 1   | -   | -    | -   | -   | -   | -   | -   | -   | 0   | -   | -   | -   | -    | -   | -   | -   | -                                                       | 0   | 1   |     |     |   |
| 228        | S          | -                 | -   | -   | -   | -   | -   | -   | -   | -   | 0   | -   | -    | -   | -   | -   | -   | -   | -   | 0   | -   | -   | -   | -    | -   | 1   | -   | -                                                       | -   | 1   |     |     |   |
| 230        | T          | -                 | -   | -   | -   | 1   | 1   | 1   | -   | 1   | 4   | -   | -    | -   | -   | 2   | 1   | 1   | -   | 5   | -   | -   | -   | -    | 1   | 1   | 2   | 1                                                       | -   | 5   |     |     |   |
| 233        | S          | -                 | -   | -   | -   | 1   | 1   | 1   | 1   | 1   | 5   | -   | -    | -   | -   | 2   | 1   | 1   | -   | 5   | -   | -   | -   | -    | 1   | 1   | 1   | 1                                                       | -   | 4   |     |     |   |
| 239        | S          | -                 | -   | -   | -   | 1   | -   | -   | -   | -   | 1   | -   | -    | -   | 1   | -   | -   | -   | -   | 2   | -   | -   | -   | -    | -   | 1   | -   | 1                                                       | 2   | 5   |     |     |   |
| 252        | S          | -                 | -   | -   | -   | -   | -   | -   | -   | -   | 0   | -   | -    | -   | -   | -   | -   | -   | -   | 0   | -   | -   | -   | 1    | -   | -   | -   | 1                                                       | 2   | 2   |     |     |   |
| 256        | Y          | -                 | -   | -   | -   | -   | -   | -   | -   | -   | 0   | -   | -    | -   | -   | -   | -   | -   | -   | 0   | -   | -   | -   | -    | -   | -   | -   | 1                                                       | 1   | 1   |     |     |   |
| 262        | T          | -                 | -   | -   | -   | -   | -   | -   | -   | -   | 0   | -   | -    | -   | -   | -   | -   | -   | -   | 0   | -   | -   | -   | 1    | -   | -   | -   | -                                                       | -   | 1   |     |     |   |
| 265        | T          | -                 | -   | -   | -   | -   | -   | -   | -   | -   | 0   | -   | -    | -   | -   | -   | -   | -   | -   | 0   | -   | -   | -   | -    | -   | -   | -   | 1                                                       | 1   | 1   |     |     |   |
| 297        | S          | -                 | -   | -   | -   | -   | -   | -   | -   | -   | 0   | 1   | -    | 1   | -   | -   | -   | -   | -   | 2   | -   | -   | -   | -    | -   | -   | -   | -                                                       | -   | 0   |     |     |   |
| 300        | T          | -                 | -   | -   | -   | -   | -   | -   | -   | -   | 0   | 1   | -    | -   | -   | -   | -   | -   | -   | 1   | -   | -   | -   | -    | -   | -   | -   | -                                                       | -   | 0   |     |     |   |
| 301        | T          | -                 | -   | 1   | -   | -   | -   | -   | -   | -   | 1   | 1   | 1    | -   | -   | -   | -   | -   | -   | 2   | 1   | -   | -   | -    | -   | -   | -   | -                                                       | -   | 4   |     |     |   |
| 302        | T          | -                 | -   | -   | -   | -   | -   | -   | -   | -   | 0   | 1   | -    | -   | -   | -   | -   | -   | -   | 1   | 1   | -   | -   | -    | -   | -   | -   | -                                                       | -   | 2   |     |     |   |
| 304        | S          | -                 | -   | -   | -   | -   | -   | -   | -   | -   | 0   | -   | -    | 1   | -   | -   | -   | -   | -   | 1   | 1   | -   | -   | -    | -   | -   | -   | -                                                       | -   | 2   |     |     |   |
| 309        | T          | -                 | -   | -   | -   | -   | -   | -   | -   | -   | 0   | -   | -    | 1   | -   | -   | -   | -   | -   | 1   | -   | -   | -   | -    | -   | -   | -   | -                                                       | -   | 1   |     |     |   |
