# Supplementary material for: Potential Phosphorylation of Viral Nonstructural Protein 1 in Dengue Virus Infection
Source: MDPI journal article supplement (doi:10.3390/v13071393), 2021-07-17
Supplement: s1 [file s1]

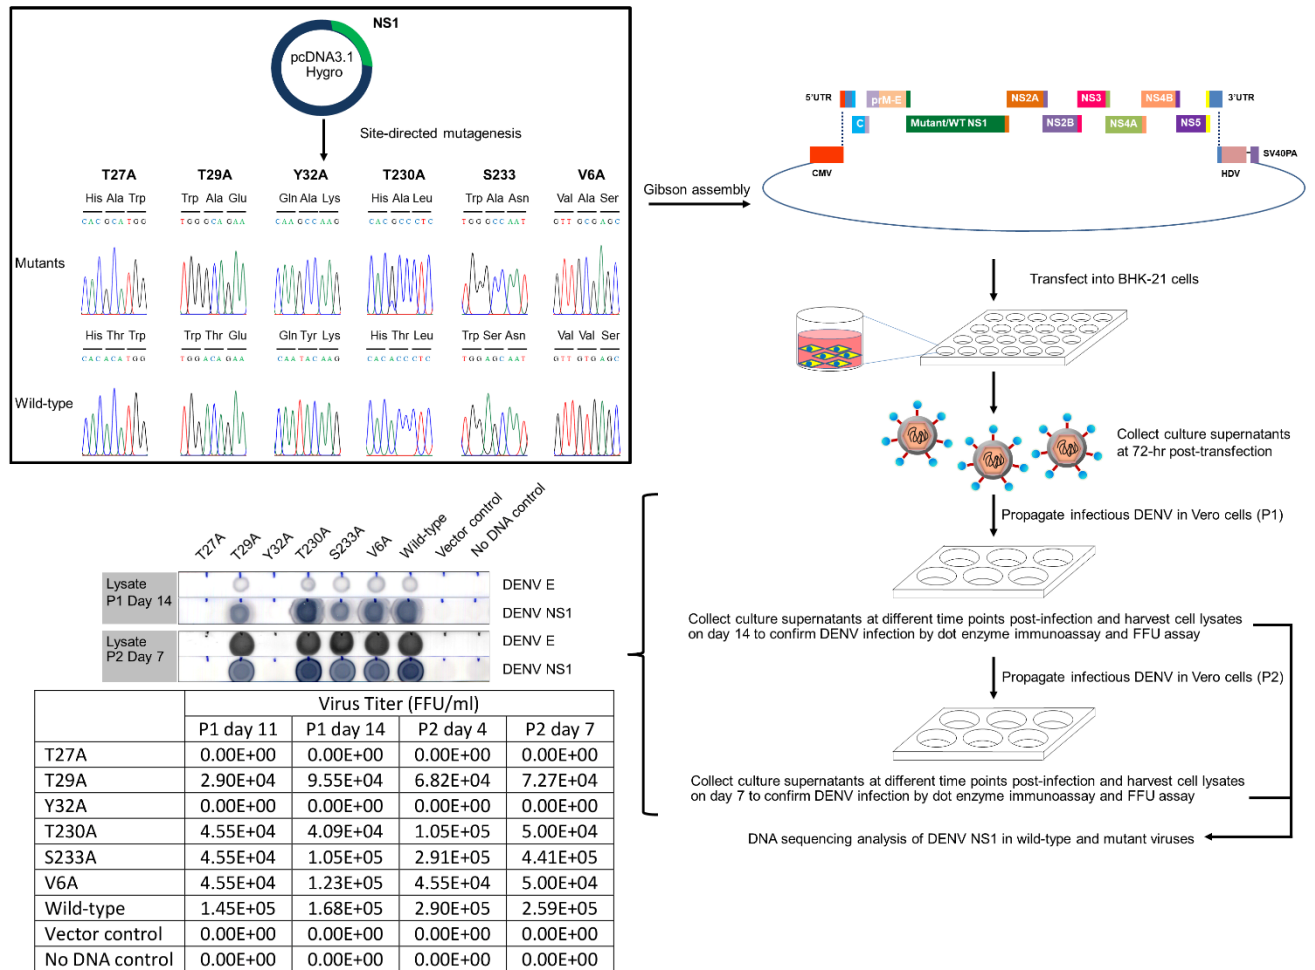

**Figure S2.** Generation of infectious DENV with NS1 mutations at potential phosphorylation sites. pcDNA-Hygro plasmid constructs carrying wild-type DENV NS1 or different DENV NS1 mutants (T27A, T29A, Y32A, T230A, S233A, or V6A) were used as templates for amplification of DENV NS1-coding amplicons. The corresponding NS1 fragments together with other DENV gene fragments and a plasmid expression vector were assembled into DENV infectious DNA by Gibson assembly, and the resulting DENV DNA products were transfected into BHK-21 cells using Lipofectamine 2000. At day 3 post-transfection, culture supernatants were harvested and transferred into Vero cell cultures to propagate the infectious DENV. Culture supernatants and cell lysates were collected at different time points post-infection and assessed for the presence of infectious DENV by dot enzyme immunoassay with anti-DENV E and anti-NS1 specific antibodies and FFU assay. Two rounds of DENV propagation (P1 and P2) were performed in Vero cell cultures. DENV NS1 sequences of wild-type and mutant viruses were verified by DNA sequencing analysis.
