# Supplementary material for: Potential Phosphorylation of Viral Nonstructural Protein 1 in Dengue Virus Infection
Source: Viruses. 2021 Jul 17;13(7):1393. doi: 10.3390/v13071393 (PMC8310366; doi:10.3390/v13071393)
Supplement: Supplementary file 1 [file viruses-13-01393-s001.zip › Supplementary Table S4 (submitted).xlsx]

## Sheet: ELM results
Table S4. Analysis of functional linear motifs of DENV NS1 using the Eukaryotic Linear Motif (ELM) resource 1
﻿ELM Name	Matched Sequences	Positions	ELM Description	Probability	Potential phophorylation sites identified in this study
CLV_PCSK_KEX2_1	KRS	101-103	Yeast kexin 2 cleavage site (K-R-|-X or R-R-|-X)	0.007973	S103
CLV_PCSK_PC1ET2_1	KRS	101-103	NEC1/NEC2 cleavage site (K-R-|-X)	0.003903	S103
CLV_PCSK_SKI1_1	KELKCRSVTRKQITPKLITERPLKE	11-15, 58-62, 69-73, 306-310, 336-340	Subtilisin/kexinisozyme-1 (SKI1) cleavage site ([RK]-X-[hydrophobic]-[LTKF]-|-X)	0.006821	S59, T72, T309
DEG_APCC_KENBOX_2	LKENQ	171-175	Motif conserving the exact sequence KEN that binds tothe APC/C subunit Cdh1 causing the protein to be targeted for 26S proteasome mediated degradation.	0.0001843	-
DEG_Nend_UBRbox_2	DS	1-2	N-terminal motif that initiates protein degradation by binding to the UBR-box of N-recognins. This N-degron variant comprises N-terminal Asp or Glu as destabilizing residue.	0.0002537
﻿DEG_SCF_TRCP1_1	DSGCVVS	1-7	The DSGxxS phospho-dependent degron binds the F box protein of the SCF-beta TrCP1 complex. The degron is found in various proteins that function in regulation of cell state.	0.0001264	-
DOC_CKS1_1	QITPEL	70-75	Phospho-dependent motif that mediates docking of CDK substrates and regulators to cyclin-CDK-bound Cks1.	0.001991	T72
DOC_MAPK_gen_1	KELKCGSGIFIKIEKASFIEV	11-21, 211-220	MAPK interacting molecules (e.g.MAPKKs, substrates, phosphatases) carry docking motif that help to regulate specific interaction in the MAPK cascade.The classic motif approximates (R/K)xxxx#x# where # is a hydrophobic residue.	0.004324	S17, S216
DOC_USP7_MATH_1	AWNSL	149-153	The USP7 MATH domain binding motif variant based on the MDM2 and p53 interactions.	0.01239	-
DOC_USP7_UBL2_3	KYSWKKTWGK	112-116, 116-120	The USP7 CTD domain binding motif variant based on the ICP0 and DNMT1 interactions.	0.003742	Y113, S114, T117
DOC_WW_Pin1_4	QPESPSKQITPE	35-40, 69-74	The Class IV WW domain interaction motif is recognised primarily by the Pin1 phosphorylation-dependent prolylisomerase.	0.01543	T72
LIG_14-3-3_CanoR_1	RAWNSLERTTTASGKLIRSCTLP	148-154, 299-308, 314-319	Canonical Arg-containing phospho-motif mediating a strong interaction with 14-3-3 proteins.	0.004477	T300, T301, T302, S304
LIG_BRCT_BRCA1_1	GSGIF	16-20	Phosphopeptide motif which directly interacts with the BRCT (carboxy-terminal) domain of the Breast Cancer Gene BRCA1 with low affinity.	0.001912	S17
LIG_deltaCOP1_diTrp_1	DTWKIEKASF	208-217	Tryptophan-based motifs enable targeting of the tethering and (dis)assembly factors to the C-terminal mu homology domain (MHD) of the coatomer subunit delta, delta-COP.	0.0005011	S216
﻿LIG_FHA_1	FITDNVHQITPELNIMTGDIKNQTFLIDVFTTNIWNDTWKIEDGTTVVVGTTVVVT	20-26, 70-76, 88-94, 130-136, 162-168, 207-213, 281-287, 282-288	Phosphothreonine motif binding a subset of FHA domains that show a preference for a large aliphatic amino acid at the pT+3 position.	0.008662	T22, T72, T90, T132,
LIG_FHA_2	VHTWTEQSVTRLEN	25-31, 59-65	Phosphothreonine motif binding a subset of FHA domains that have a preference for an acidic amino acid at the pT+3 position.	0.008286	T27, T29, S59, T61
LIG_LIR_Gen_1	TNIWLKLSFIEV	165-171, 216-220	Canonical LIR motif that binds to Atg8 protein family members to mediate processes involved in autophagy.	0.003057	S216
LIG_LIR_Nem_3	DYGFGVFTNIWLKLSFIEV	157-163, 165-171, 216-220	Nematode-specific variant of the canonical LIR motif that binds to Atg8 protein family members to mediate processes involved in autophagy.	0.006362	S216
LIG_PDZ_Class_2	NSLVTA	347-352	The C-terminal class 2 PDZ-binding motif is classically represented by a pattern such as (VYF)X(VIL)*	7.889e-05	-
LIG_Pex14_1	WTEQY	28-32	Wxxx[FY] motifs present in N-terminal half of Pex5 bind to Pex13 and Pex14 at peroxisomal and glycosomal membranes to facilitate entrance of PTS1 cargo proteins into the organellar lumen.	0.0002226	T29, Y32
LIG_SH2_STAT3	YKFQYHTQ	32-35, 260-263	YXXQ motif found in the cytoplasmic region of cytokine receptors that bind STAT3 SH2 domain.	0.0007975	Y32, T262
LIG_SH3_1	KFQPESP	33-39	This is the motif recognized by class I SH3 domains.	0.001237	-
LIG_SH3_2	PESPSK	36-41	This is the motif recognized by class II SH3 domains.	0.001111	-
LIG_SH3_3	KFQPESP	33-39	This is the motif recognized by those SH3 domains with a non-canonical class I recognition specificity.	0.01317	-
LIG_SUMO_SIM_par_1	TTVVVTED	283-290	Motif for the parallel beta augmentation mode of non-covalent binding to SUMO protein.	0.004545	-
LIG_TRAF2_1	AHEE	49-52	Major TRAF2-binding consensus motif. Members of the tumor necrosis factor receptor (TNFR) superfamily initiate intracellular signaling by recruiting the C-domain of the TNFR-associated factors (TRAFs) through their cytoplasmic tails.	0.0043	-
﻿LIG_TRAF6	PQPTELKYS	106-114	TRAF6 binding site. Members of the tumor necrosis factor receptor (TNFR) superfamily initiate intracellular signaling by recruiting the C-domain of the TNFR-associated factors (TRAFs) through their cytoplasmatic tails.	0.001715	Y113, S114
LIG_WD40_WDR5_VDV_2	SPSKLASASKLASATPELSENEVKLENEVKLTIEVKLTISLEVTTNIWLKLTNIWLKLEKASFIEVSFIEVSLVTA	38-45, 40-45, 72-75, 80-86, 81-88, 83-88, 152-155, 164-171, 165-171, 213-220, 216-220, 348-352	Fungi-specific variant of the WDR5-binding motif that binds to a cleft between blades 5 and 6 of the WD40 repeat domain of WDR5, opposite of the Win motif-binding site, to mediate assembly of histone modification complexes.	0.04678	T72, S80, T87, S216
MOD_CDK_SPxK_1	QPESPSK	35-41	Canonical version of the CDK phosphorylation site which shows specificity towards a lysine/arginine residue at the[ST]+3 position.	0.001929	-
MOD_CK1_1	SWKTWGKSTESHNQSLRTTTA	114-120, 125-131, 297-303	Casein kinase 1 (CK1) phosphorylation site	0.01704	S114, T117, S125, T126, S128, S297, T300, T301, T302
MOD_CK2_1	NVHTWTERSVTRLEHILSENEEKASFIE	24-30, 58-64, 77-83, 213-219	Casein kinase 2 (CK2) phosphorylation site	0.01457	T27, T29, S59, T61, S80, S216
MOD_CMANNOS	WKTW	115-118	Motif for attachment of a mannosyl residue to a tryptophan	4.692e-05	T117
MOD_Cter_Amidation	AGKR	99-102	Peptide C-terminal amidation	0.001155	-
MOD_GlcNHglycan	DSGCGSGIASAIMSAAESALASGK	1-4, 16-19, 43-46, 184-187, 203-206, 303-306	Glycosaminoglycan attachment site	0.01792	S17, S185, S204, S304
MOD_GSK3_1	ESPSKLASSTESHNQTFCDSKLMSDGTTVVVTRGPSLRTTSLRTTTAS	37-44, 125-132, 178-185, 281-288, 294-301, 297-304	GSK3 phosphorylation recognition site	0.02679	S125, T126, S128, T132, S181, S185, S297, T300, T301, T302, S304
MOD_N-GLC_1	HNQTFLLNDTWK	129-134, 206-211	Generic motif for N-glycosylation. It was shown that Trp, Asp, and Glu are uncommon before the Ser/Thr position. Efficient glycosylation usually occurs when ~60 residues or more separate the glycosylation acceptor site from the C-terminus.	0.005018	T132
﻿MOD_NEK2_1	LKYSWKFCDSKLLNDTWKLRTTTALVNSLV	111-116, 178-183, 206-211, 298-303, 345-350	NEK2 phosphorylation motif with preferred Phe, Leu or Met in the -3 position to compensate for less favorable residues in the +1 and +2 position.	0.009798	Y113, S114, S181, T300, T301, T302
MOD_NEK2_2	GKRSLR	100-105	NEK2 phosphorylation motif with specific set of residues in the +1 and +2 position to compensate for less favorable residues in the -3 position.	0.001295	S103
MOD_PIKK_1	GPVSQHNGYHTQIT	249-255, 259-265	(ST)Q motif which is phosphorylated by PIKK family members.	0.00923	S252, T262, T265
MOD_PKA_2	LRTTTAS	298-304	Secondary preference for PKA-type AGC kinase phosphorylation.	0.009458	T300, T301, T302, S304
MOD_Plk_1	HNQTFLILNDTWKI	129-135, 206-212	Ser/Thr residue phosphorylated by the Plk1 kinase	0.007674	T132
MOD_Plk_2-3	EKASFIE	213-219	Ser/Thr residue phosphorylated by Plk2 and Plk3	0.002175	S216
MOD_Plk_4	VKLTIMTHNQTFLIEKASFIEKSHTLWSDGTTVVVLVNSLVT	84-90, 129-135, 213-219, 227-233, 281-287, 345-351	Ser/Thr residue phosphorylated by Plk4	0.006019	T87, T90, T132, S216, S228, T230, S233
MOD_ProDKin_1	QPESPSKKQITPEL	35-41, 69-75	Proline-directed kinase (e.g.MAPK) phosphorylation site in higher eukaryotes.	0.01543	T72
MOD_SUMO_rev_2	SENEVKLTENEVKLTDVFCDSKLM	80-87, 81-87, 176-184	Inverted version of SUMOylation motif recognized for modification by SUMO-1.	0.0128	S80, T87, S181
TRG_Pf-PMV_PEXEL_1	RSLRPQRPLKE	102-107, 336-340	Plasmodium Export Element, PEXEL, is a trafficking signal for protein cleavage by PMV protease and export from Plasmodium parasites to infected host cells.	0.002161	S103
1 The NS1 protein sequence of DENV-2 (strain 16681) was used for the ELM analysis.
